# Supplementary material
Source: PubMed Central journal article supplement (PMC5483384)
Supplement: NIHMS857770-supplement-supplement_1.pdf [file NIHMS857770-supplement-supplement_1.pdf]

MMP: matrix metalloproteinase. INF-r: *interferon-r*, TNF-a: tumor necrosis factor-a. IL: interleukin. CCL: chemokine (C-C motif) ligand. CXCL: chemokine(C-X-C motif) ligand. G-CSF: granulocyte-colony stimulating factor. TIMP-1: tissue inhibitor of metalloproteinases-1. TREM-1: triggering receptor expressed on myeloid cells 1. PAI-1: plasminogen activator inhibitor-1. AKT: protein kinase B. t-PA: Tissue plasminogen activator. U-PA: *cytokine*-regulated urokinase-type-plasminogen-activator. JNK: c-Jun N-terminal kinase.

**Table III.** Comparison of elastase-induced AAA in young mice with different geriatric mice groups at day 14 post-surgery. The survival rate, incidence of AAA rate and aortic diameter seemed lower as the mice grew older, but there were no statistical differences among groups ( $P > .05$ ).

**Suppl 1.** 3-Dimensional magnetic resonance images of AAA with thrombus from 100 day BAPN+Elastase Group. MRI images rotate clockwise from left to right. MRI images showed huge abdominal aneurysm of the infra-renal aorta with thrombi (arrows), demonstrating the dramatic anatomical and hemodynamic changes inside the AAA.

**Suppl 2.** Comparison of inflammatory cytokines levels in aortic samples. Multiple cytokine levels were higher in BAPN+Elastase Group than Elastase Group on day 7 post-surgery. MCP-1, TIMP-1 and IL-23 levels were higher in BAPN+Elastase Group than Elastase Group at all time points during the experiment. Blue---BAPN Group; Red--- Elastase Group; Green--- BAPN+Elastase Group.

**Suppl 3.** Comparison of MMP levels in aortic samples among three groups. Zymography showed higher level of pro-MMP2 in BAPN+Elastase Group at days 21 and 100. MMP9 levels were only elevated during the early stage of aneurysm formation. BAPN+Elastase Group compared with Elastase Group \*  $P < .05$ , \*\*  $P < .01$ . Blue---BAPN Group; Red--- Elastase Group; Green---BAPN+Elastase.

**Suppl 4.** Comparison of aortic cytokines levels between Elastase Group and BAPN+Elastase Group. E 7 --- Elastase Group on day 7; B+E 7 --- BAPN+Elastase Group on day 7.
